# Supplementary material for: Ag/TiO2 and Ag/SiO2 composite spheres: synthesis, characterization and antibacterial properties
Source: Royal Society of Chemistry journal article supplement (doi:10.1039/c3ra40596f), 2013-01-01
Supplement: c3ra40596f.pdf [file c3ra40596f.pdf]

## Electronic Supplementary Information

# Ag/TiO<sub>2</sub> and Ag/SiO<sub>2</sub> Composite Spheres: Synthesis, Characterization and Antibacterial Properties

Qiushuang Zhang<sup>a</sup>, Junwei Ye<sup>\*a</sup>, Peng Tian<sup>a</sup>, Xinyi Lu<sup>a</sup>, Yuan Lin<sup>a</sup>, Qi Zhao<sup>\*b</sup>, Guiling Ning<sup>\*a</sup>

<sup>a</sup>*State Key Laboratory of Fine Chemicals and School of Chemical Engineering, Dalian University of Technology, 2 Linggong Road, Dalian 116012, P. R. China. E-mail: junweiy@dlut.edu.cn; ninggl@dlut.edu.cn; Fax: +86-411-84986067.*

<sup>b</sup>*Department of Mechanical Engineering, University of Dundee, DD1 4HN, UK. E-mail: Q.Zhao@dundee.ac.uk*

**CAPTIONS:**

**Fig. S1** SEM image of Ag/SiO<sub>2</sub> composite.

**Fig. S2** XRD pattern of Ag/SiO<sub>2</sub> composite (the enlarged view of 2θ range from 5° to 35° in inset).

**Fig. S3** XRD pattern of TiO<sub>2</sub> hollow spheres after calcined at 500 °C.

**Fig. S4** EDX image of Ag/TiO<sub>2</sub> composite.

**Fig. S5** TG curve of Ag<sub>2</sub>CO<sub>3</sub>/TiO<sub>2</sub>·xH<sub>2</sub>O.

**Fig. S6** FT-IR spectra of (a) CaMg(CO<sub>3</sub>)<sub>2</sub>, (b) CaMg(CO<sub>3</sub>)<sub>2</sub>/TiO<sub>2</sub>·xH<sub>2</sub>O, (c) Ag<sub>2</sub>CO<sub>3</sub>/TiO<sub>2</sub>·xH<sub>2</sub>O and (d) Ag/TiO<sub>2</sub> composite.

**Fig. S7** XRD patterns of samples obtained with different concentration of AgNO<sub>3</sub> solution.

**Fig. S8** SEM images of samples obtained with different concentration of AgNO<sub>3</sub> solution: (a) 0.1 mol/L, (b) 0.3 mol/L and (c) 0.5 mol/L.

**Fig. S9** EDX of Ag/TiO<sub>2</sub> composite obtained at different reaction time: (a) 4h and (b) 8 h.

**Fig. S10** XRD patterns of Ag/TiO<sub>2</sub> composite obtained at different calcined temperature: (a) 400 °C, (b) 500 °C and (c) 600 °C.

**Fig. S11** SEM images of Ag/TiO<sub>2</sub> composite obtained at different calcined temperature: (a) 400 °C, (b) 500 °C and (c) 600 °C.

**Fig. S12** The relationship between antibacterial activity and concentration of Ag/TiO<sub>2</sub> composite.

**Fig. S13** SEM images of Ag-NPs, SiO<sub>2</sub> and TiO<sub>2</sub> hollow spheres.

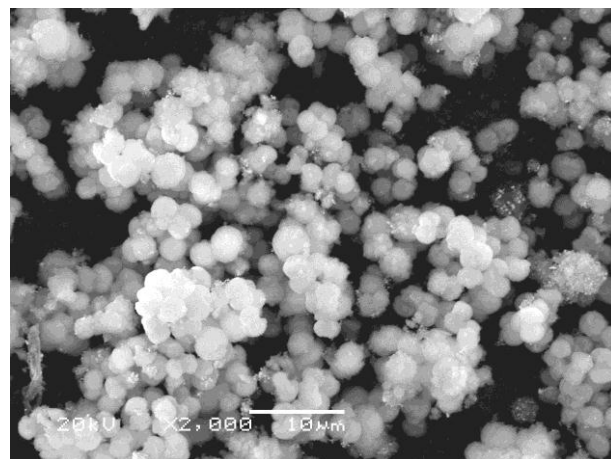

Fig. S1 SEM image of Ag/SiO<sub>2</sub> composite

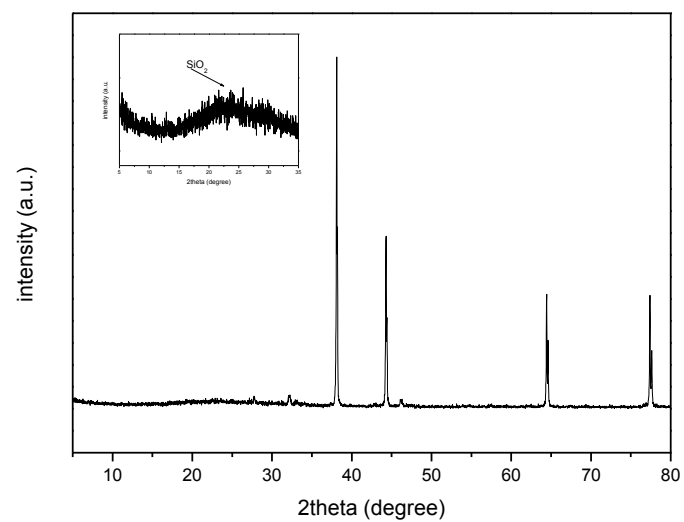

Fig. S2 XRD pattern of Ag/SiO<sub>2</sub> composite (the enlarged view of 2θ range from 5° to 35° in inset).

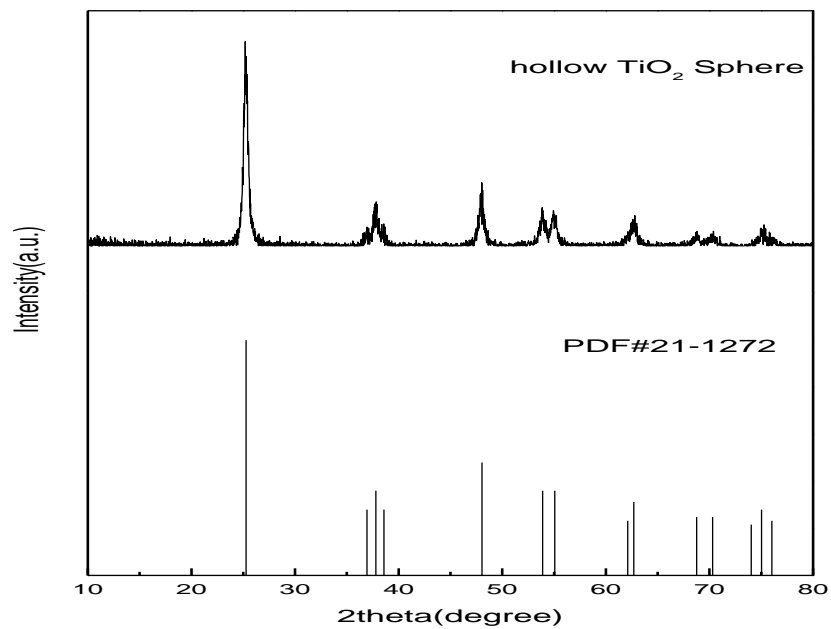

Fig. S3 XRD pattern of TiO<sub>2</sub> hollow spheres after calcined at 500 °C.

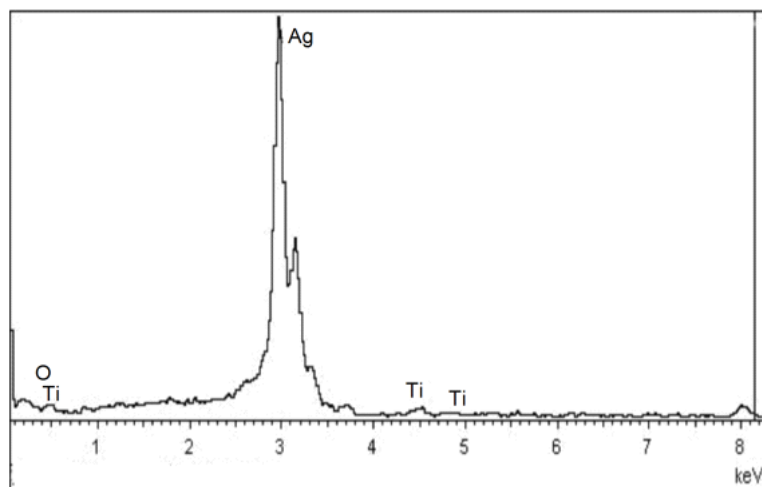

Fig. S4 EDX image of Ag/TiO<sub>2</sub> composite.

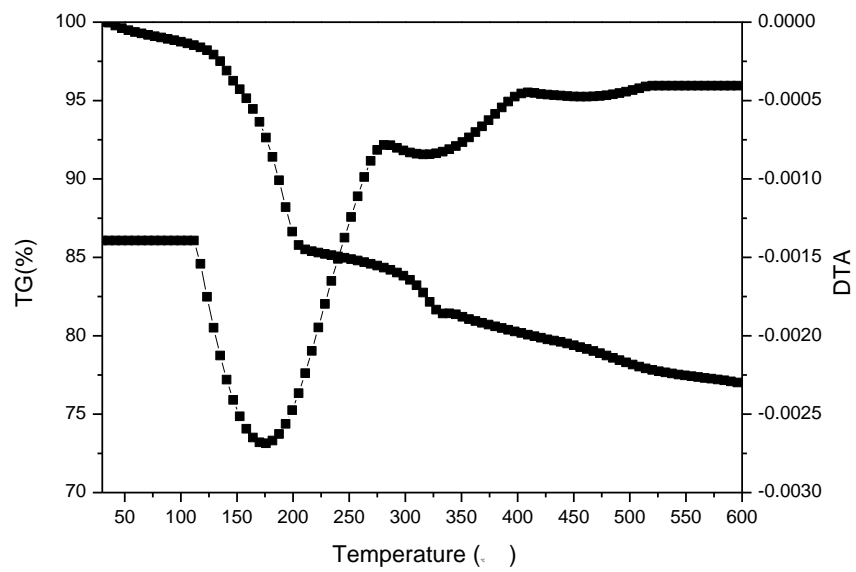

Fig. S5 TG curve of  $\text{Ag}_2\text{CO}_3/\text{TiO}_2 \cdot x\text{H}_2\text{O}$ .

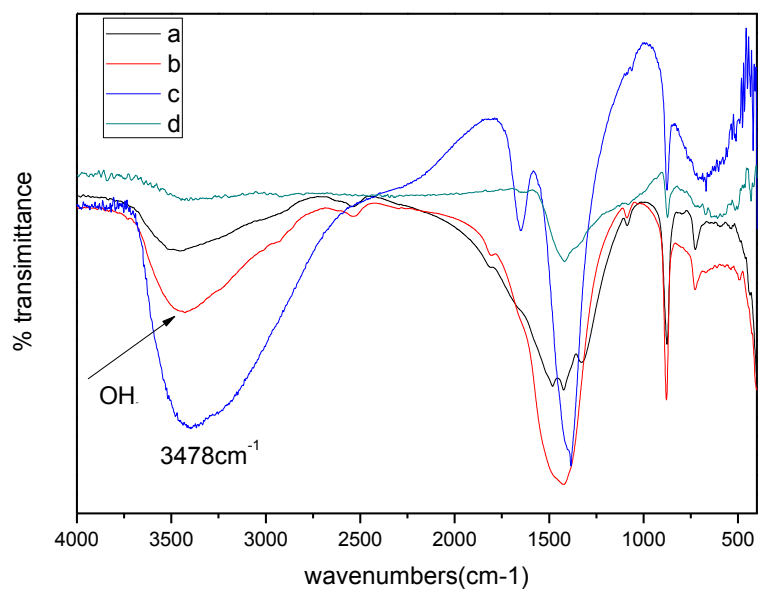

Fig. S6 FT-IR spectra of (a)  $\text{CaMg}(\text{CO}_3)_2$ , (b)  $\text{CaMg}(\text{CO}_3)_2/\text{TiO}_2 \cdot x\text{H}_2\text{O}$ , (c)  $\text{Ag}_2\text{CO}_3/\text{TiO}_2 \cdot x\text{H}_2\text{O}$  and (d)  $\text{Ag}/\text{TiO}_2$  composite.



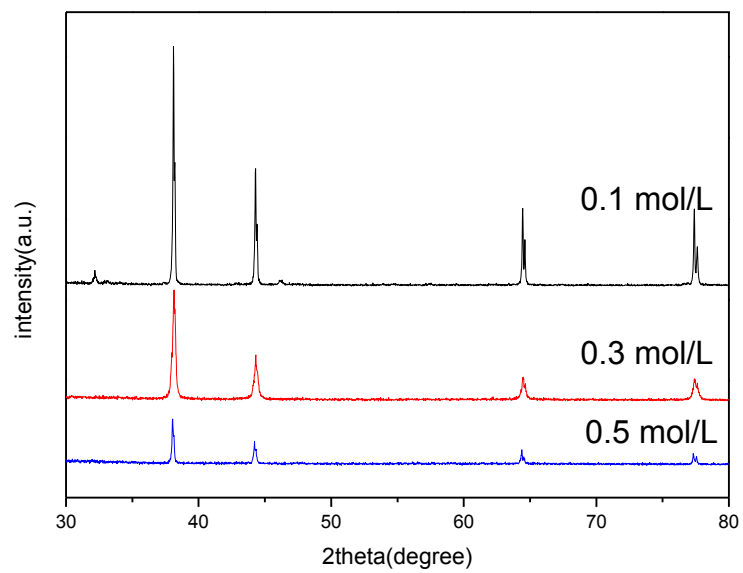

**Fig. S7** XRD patterns of samples obtained with different concentration of  $\text{AgNO}_3$  solution.

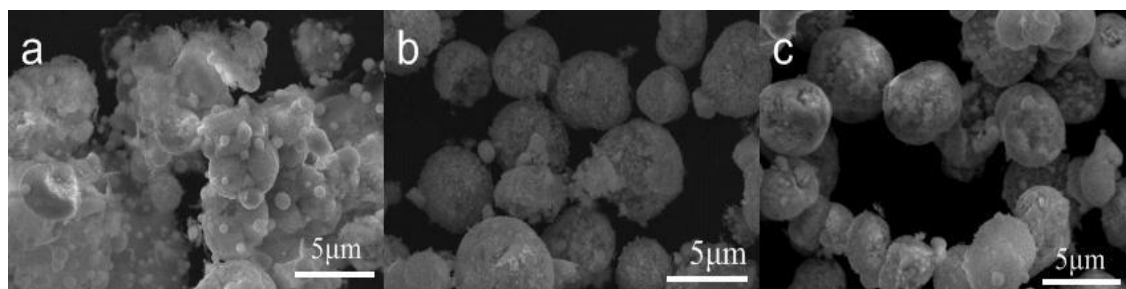

**Fig. S8** SEM images of samples obtained with different concentration of  $\text{AgNO}_3$  solution: (a) 0.1 mol/L, (b) 0.3 mol/L and (c) 0.5 mol/L.

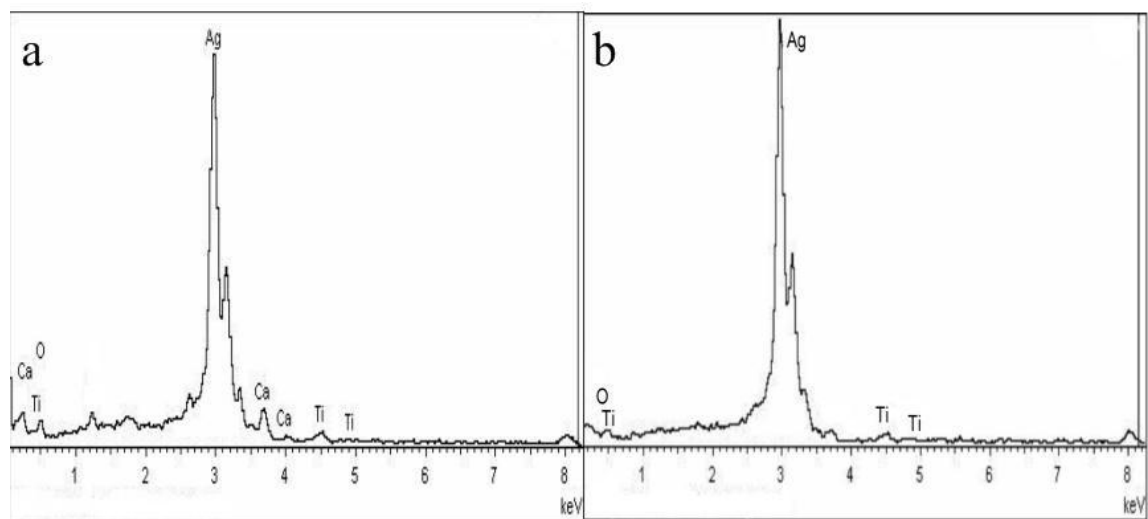

**Fig. S9** EDX of Ag/TiO<sub>2</sub> composite obtained at different reaction time: (a) 4h and (b) 8 h.

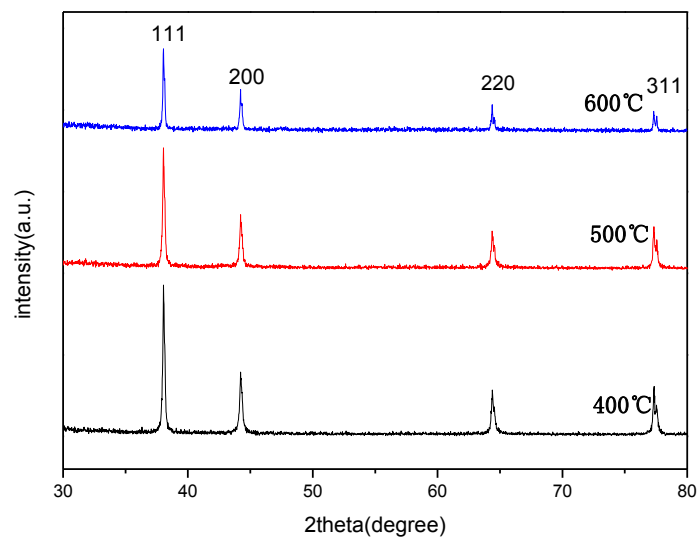

**Fig. S10** XRD patterns of Ag/TiO<sub>2</sub> composite obtained at different calcined temperature: (a) 400 °C, (b) 500 °C and (c) 600 °C

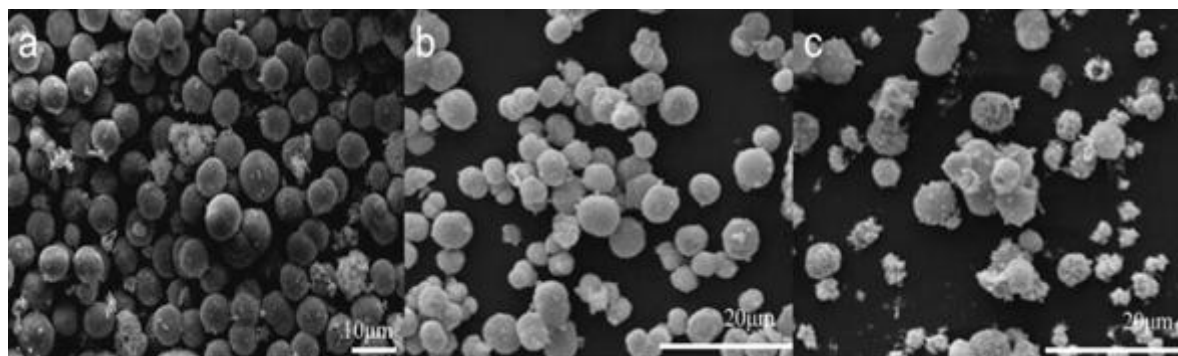

Fig. S11 SEM images of Ag/TiO<sub>2</sub> composite obtained at different calcined temperature: (a) 400 °C, (b) 500 °C and (c) 600 °C.

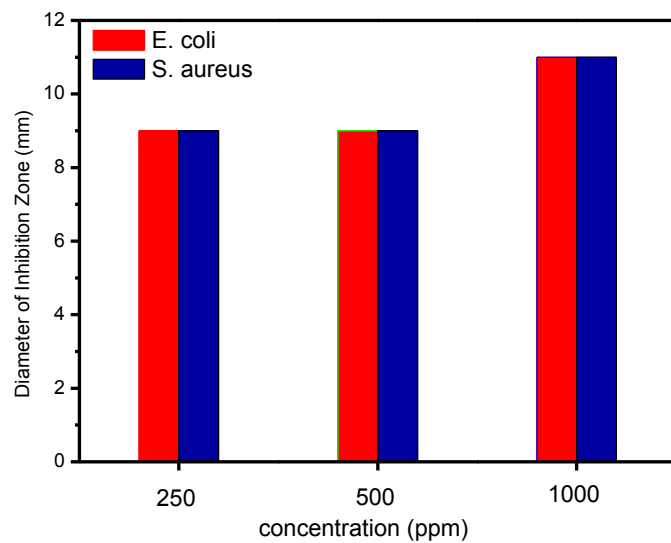

Fig. S12 The relationship between antibacterial activity and concentration of Ag/TiO<sub>2</sub> composite.

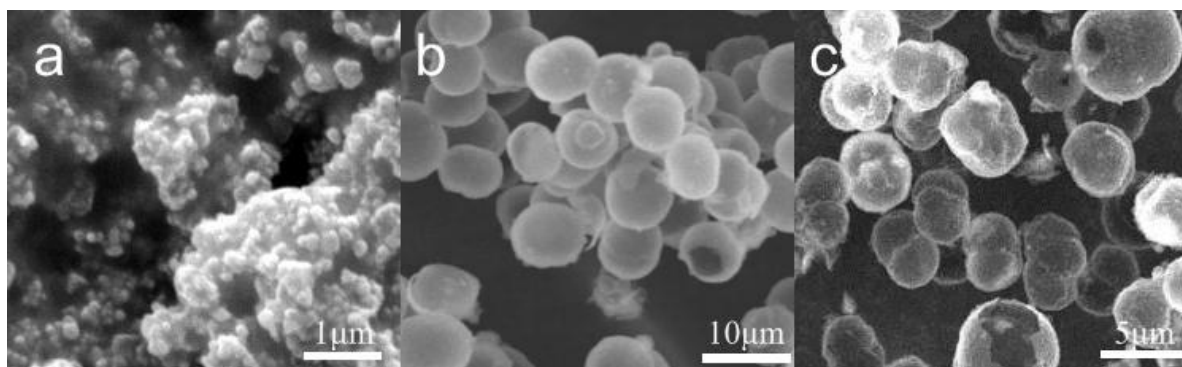

Fig. S13 SEM images of Ag-NPs, SiO<sub>2</sub> and TiO<sub>2</sub> hollow spheres.
